# Supplementary material
Source: Springer Nature journal article supplement (https://www.springermedizin.de/resource/supplementary/12891_2012_1703_MOESM8_ESM.pdf/9508396)
Supplement: MOESM8 [file 9508396]

**Applied Loads**

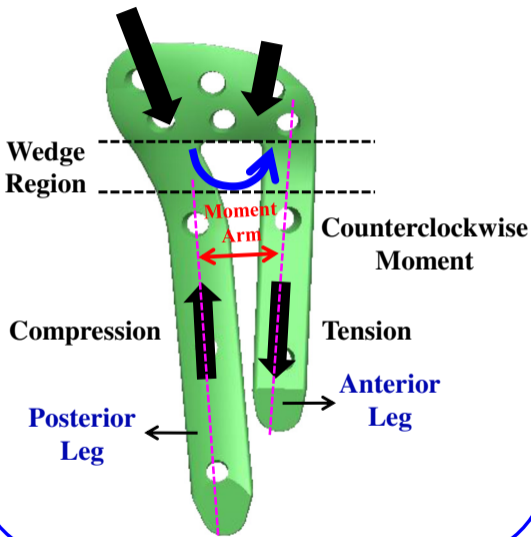

**Wedge  
Region**

**Moment  
Arm**

**Counterclockwise  
Moment**

**Compression**

**Tension**

**Posterior  
Leg**

**Anterior  
Leg**

**Sagittal Plane**
